# Supplementary material
Source: Springer Nature journal article supplement (https://www.springermedizin.de/resource/supplementary/12943_2013_1236_MOESM10_ESM.pdf/9552680)

Figure 5

C

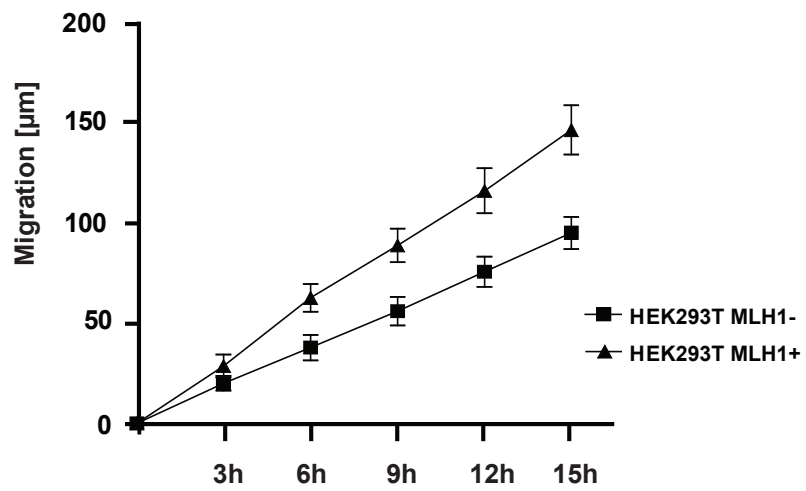

B

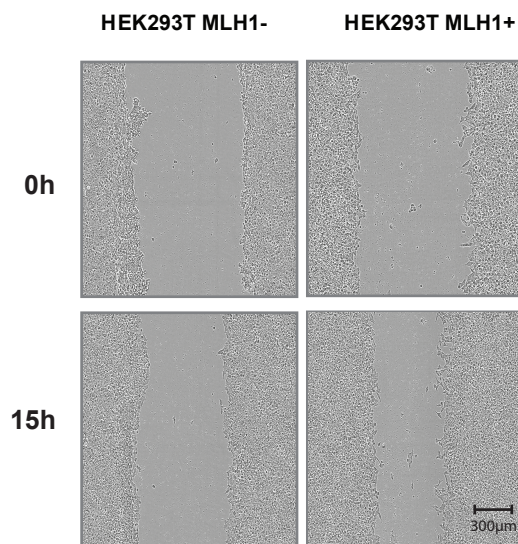

Supplement: MOESM10 [file 9552680]
